# Supplementary material for: Ribosome Protein Composition Mediates Translation during the Escherichia coli Stationary Phase
Source: MDPI journal article supplement (doi:10.3390/ijms24043128), 2023-02-04
Supplement: s1 [file s1]

**Table S1 - Peptide masses used for analysis from hibernation factors  
and bL31 & bL36 paralogs**

| Protein Name | Peptide Sequence            | Ion Charge <sup>a</sup> | m/z (unlabeled) <sup>a</sup> | m/z (heavy labeled) <sup>a</sup> | m/z (medium-heavy labeled) <sup>a</sup> |
|--------------|-----------------------------|-------------------------|------------------------------|----------------------------------|-----------------------------------------|
| bL31A        | STVGHDNLNDVCSK              | 2                       | 772.8723                     | 776.8794                         | 774.8849                                |
|              | CHPFFTgK                    | 2                       | 497.2342                     | 501.2413                         | 499.2467                                |
|              | VDRFNK                      | 2                       | 389.7139                     | 398.7252                         | 394.7366                                |
|              | VDRFNKR                     | 2                       | 467.7645                     | 481.7799                         | 475.7972                                |
| bL31B        | TVVFHDTSVDEYFK              | 3                       | 562.9385                     | 565.6099                         | 564.2802                                |
|              | IGSTIKTDREIELDGVTPYVTIDVSSK | 3                       | 1033.8747                    | 1042.5536                        | 1038.5648                               |
|              | TDREIELDGVTPYVTIDVSSK       | 3                       | 834.0866                     | 840.0941                         | 837.4350                                |
|              | SHPFYTGK                    | 2                       | 468.7323                     | 472.7394                         | 470.7449                                |
|              | LRTVASEGNVAR                | 2                       | 636.8546                     | 646.8628                         | 642.8747                                |
|              | TVASEGNVAR                  | 2                       | 502.2620                     | 507.2661                         | 505.2721                                |
| bL36A        | VICSAEPK                    | 2                       | 452.2339                     | 456.2410                         | 454.2464                                |
| bL36B        | VLNSLR                      | 2                       | 351.2189                     | 356.2230                         | 354.2289                                |
|              | ERHPDCQIVKR                 | 4                       | 360.1899                     | 367.1976                         | 364.2063                                |
| Rmf          | GYQAGIAGR                   | 2                       | 446.7354                     | *                                |                                         |
| Hpf          | LEQYFDR                     | 2                       | 485.7351                     |                                  |                                         |
|              | INQVYVVLK                   | 2                       | 538.3291                     |                                  |                                         |
| Sra          | HILGLDHK                    | 2                       | 466.7693                     |                                  |                                         |
|              | KIVTEGDKSSVNNPTGR           | 2                       | 951.0080                     |                                  |                                         |
|              | IVTEGDKSSVNNPTGR            | 2                       | 886.9605                     |                                  |                                         |
| RaiA         | LAKLEK                      | 2                       | 351.2314                     |                                  |                                         |
|              | WQTHLINPHILSK               | 2                       | 850.4858                     |                                  |                                         |
|              | RAATSVKDANFVEEVEEE          | 2                       | 1011.9844                    |                                  |                                         |
|              | AATSVKDANFVEEVEEE           | 2                       | 933.9338                     |                                  |                                         |

a) Ion charge and peptide m/z values are for precursor MS1 particles

Footnotes:

\* For proteins Hpf, Rmf, Sra, RaiA heavy and medium-heavy labeled peptide were not indentified/determined
