# Supplementary material for: Ribosome Protein Composition Mediates Translation during the Escherichia coli Stationary Phase
Source: MDPI journal article supplement (doi:10.3390/ijms24043128), 2023-02-04
Supplement: s1 [file s1]

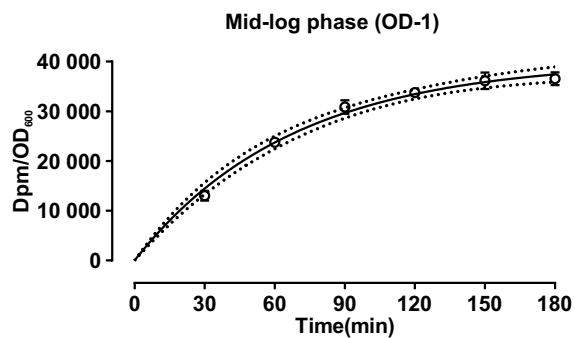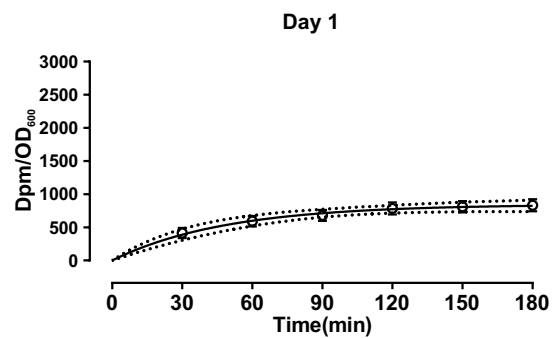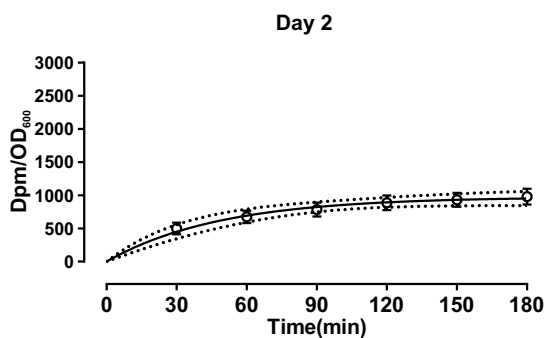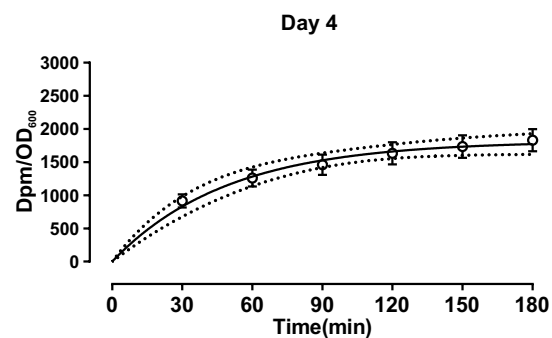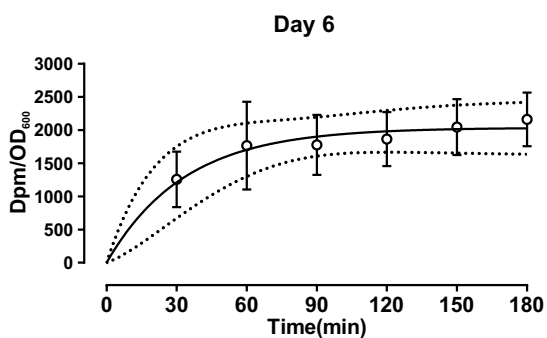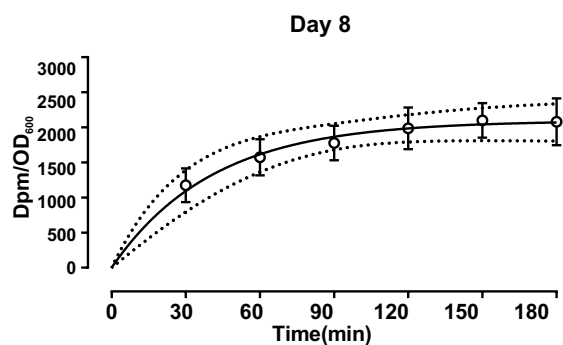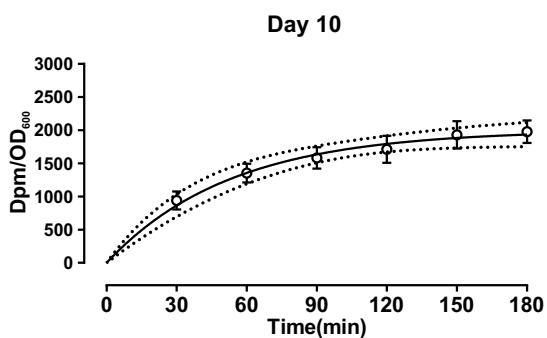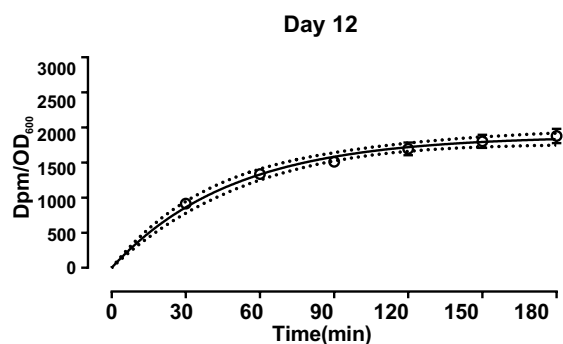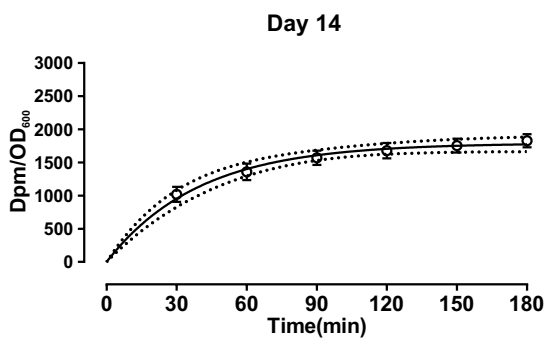

**Figure S1 – Translation activity in *E.coli* during the stationary phase.** Bacterial culture was grown for 14 days. A radioactive isotope-labeled amino acids mix was added to a portion of the culture at designated time points. Samples were taken every 30 min over 3 h of incubation. Samples were TCA precipitated and the incorporation of the radioactive label over time was measured. Obtained values of disintegrations per minute (DPM) were normalized against  $A_{600}$  and plotted. Values shown in the figure are the mean of three independent biological experiments with standard deviation ( $n=3$ ; mean  $\pm$  SD).
