# Supplementary material for: Ribosome Protein Composition Mediates Translation during the Escherichia coli Stationary Phase
Source: MDPI journal article supplement (doi:10.3390/ijms24043128), 2023-02-04
Supplement: s1 [file s1]

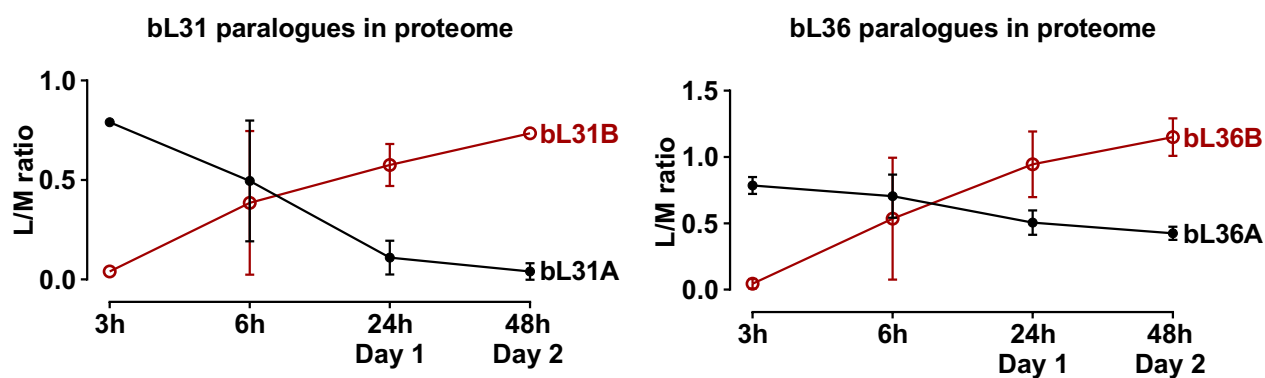

**Figure S4 - bL31 and bL36 paralogues in *E.coli* early stationary phase proteome.** Samples were collected over the course of two days. Total protein from the cells was mixed with reference ribosomes containing a known quantity of bL31A and bL36A (A reference) or bL31B and bL36B (B reference) and analyzed using qMS. The relative quantity of r-proteins is shown as the L/M ratio (Y-axis) and is normalized to the average L/M ratio of 50S r-proteins in the sample. Values shown in the figure are the mean of two independent biological experiments with standard deviation (n=2; mean  $\pm$  SD).
