# Supplementary material for: Ribosome Protein Composition Mediates Translation during the Escherichia coli Stationary Phase
Source: MDPI journal article supplement (doi:10.3390/ijms24043128), 2023-02-04
Supplement: s1 [file s1]

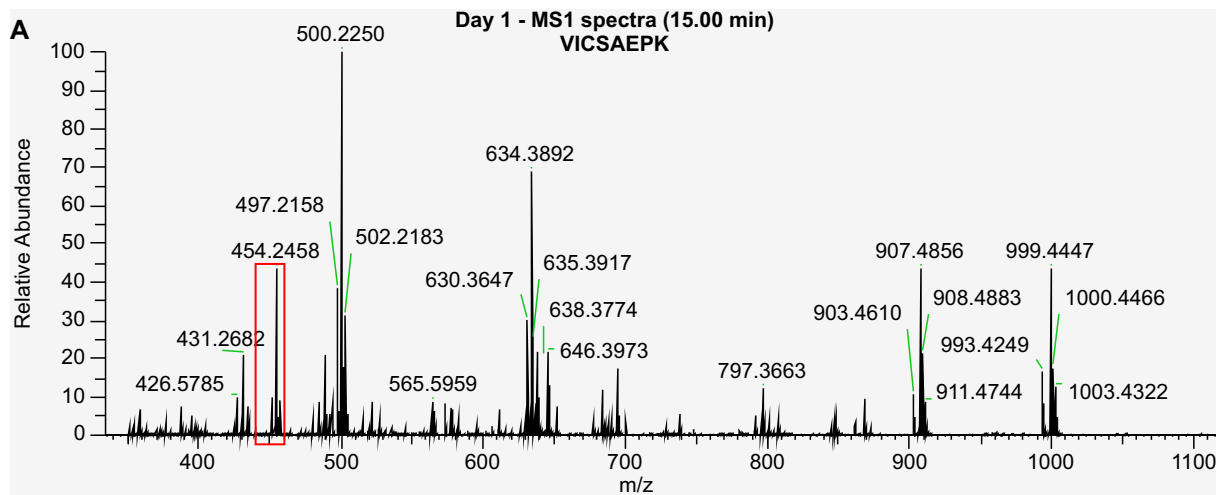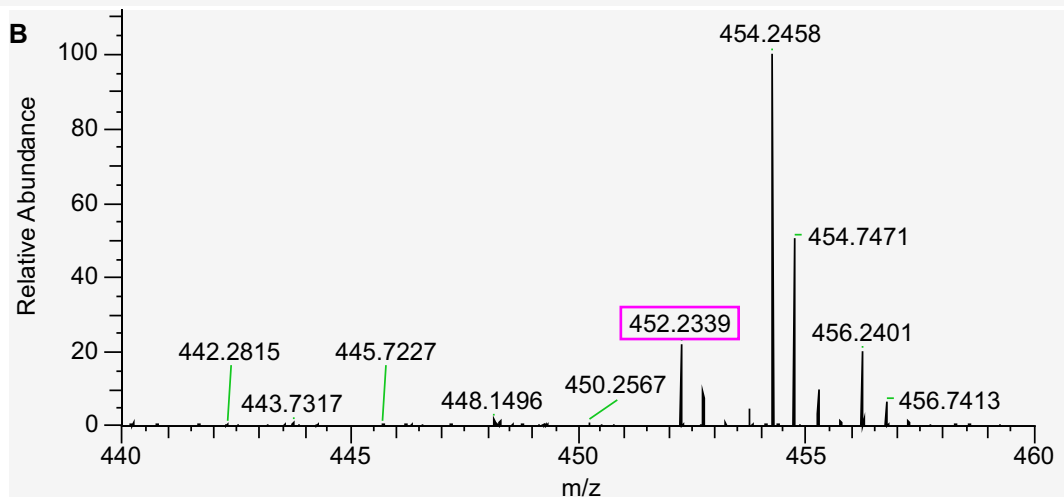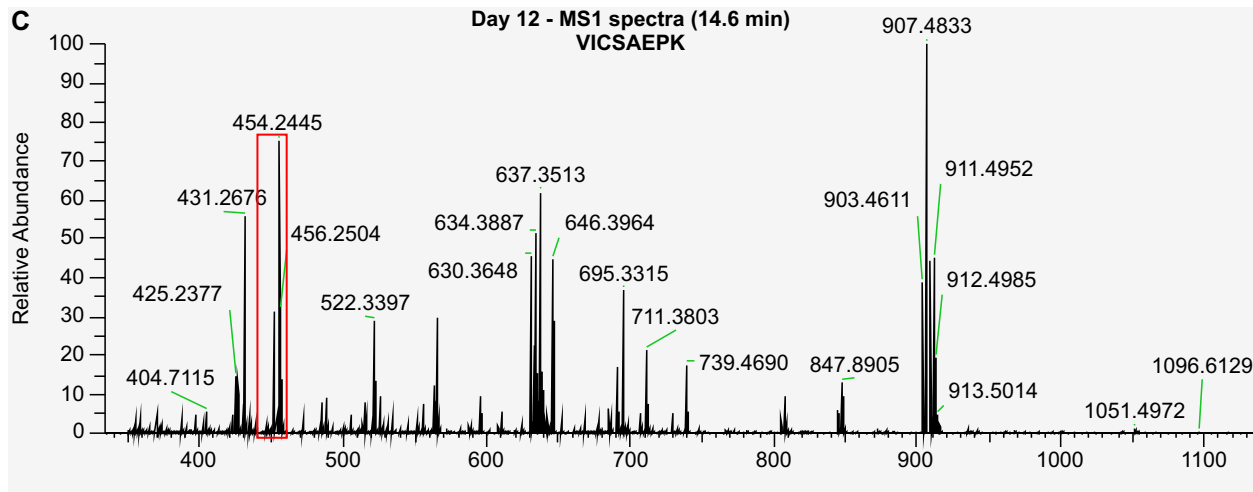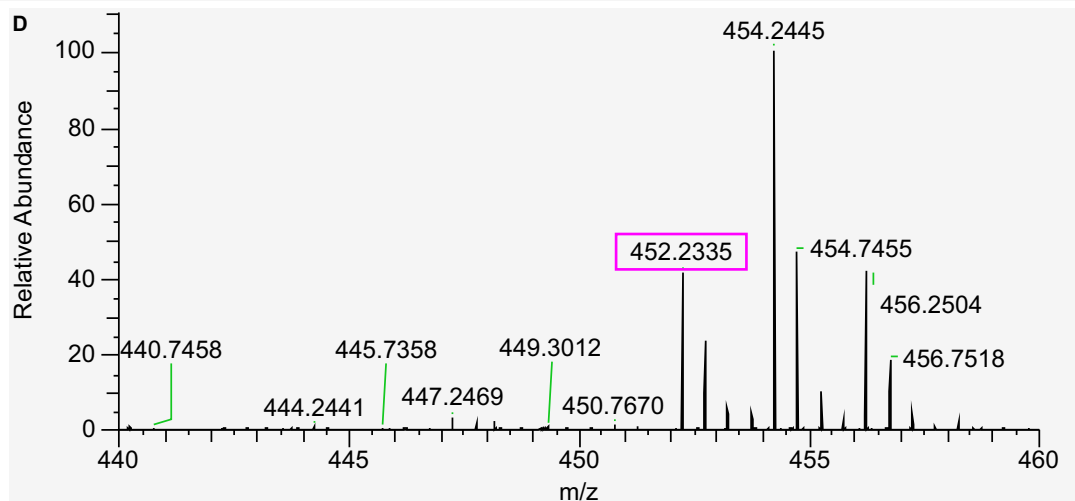

Figure S5 - Representative MS1 spectra of bL36A peptide VICSAEPK. (A&C) Overview of MS1 spectra from day 1 and day 12 with magnified part shown in red. (B&D) Magnified view of spectra, VICSAEPK peptide shown in magenta. Spectra's shown are from LC-MS/MS with retention times 15.00 min (day 1) and 14.60 min (day 12).
